# Supplementary material
Source: PubMed Central journal article supplement (PMC8561233)
Supplement: mmc1.pdf [file mmc1.pdf]

## Supplemental information

### **Determinants of SARS-CoV-2 entry and replication in airway mucosal tissue and susceptibility in smokers**

**Tsuguhisa Nakayama, Ivan T. Lee, Sizun Jiang, Matthias S. Matter, Carol H. Yan, Jonathan B. Overdevest, Chien-Ting Wu, Yury Goltsev, Liang-Chun Shih, Chun-Kang Liao, Bokai Zhu, Yunhao Bai, Peter Lidsky, Yinghong Xiao, David Zarabanda, Angela Yang, Meena Easwaran, Christian M. Schürch, Pauline Chu, Han Chen, Anna K. Stalder, David R. McIlwain, Nicole A. Borchard, Phillip A. Gall, Sachi S. Dholakia, Wei Le, Le Xu, Chih-Jaan Tai, Te-Huei Yeh, Elizabeth Erickson-Direnzo, Jason M. Duran, Kirsten D. Mertz, Peter H. Hwang, Jasmin D. Haslbauer, Peter K. Jackson, Thomas Menter, Raul Andino, Peter D. Canoll, Adam S. DeConde, Zara M. Patel, Alexandar Tzankov, Garry P. Nolan, and Jayakar V. Nayak**

**Cell Reports Medicine, Volume 2**

**Supplemental information**

**Determinants of SARS-CoV-2 entry  
and replication in airway mucosal tissue  
and susceptibility in smokers**

**Tsuguhisa Nakayama, Ivan T. Lee, Sizun Jiang, Matthias S. Matter, Carol H. Yan, Jonathan B. Overvest, Chien-Ting Wu, Yury Goltsev, Liang-Chun Shih, Chun-Kang Liao, Bokai Zhu, Yunhao Bai, Peter Lidsky, Yinghong Xiao, David Zarabanda, Angela Yang, Meena Easwaran, Christian M. Schürch, Pauline Chu, Han Chen, Anna K. Stalder, David R. McIlwain, Nicole A. Borchard, Phil A. Gall, Sachi S. Dholakia, Wei Le, Le Xu, Chih-Jaan Tai, Te-Huei Yeh, Elizabeth Erickson-Direnzo, Jason M. Duran, Kirsten D. Mertz, Peter H. Hwang, Jasmin D. Haslbauer, Peter K. Jackson, Thomas Menter, Raul Andino, Peter D. Canoll, Adam S. DeConde, Zara M. Patel, Alexandar Tzankov, Garry P. Nolan, and Jayakar V. Nayak**

**Figure S1**

**A**

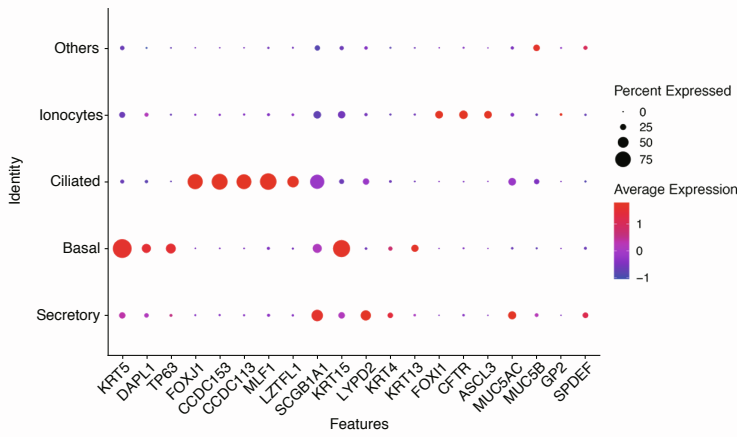

**B**

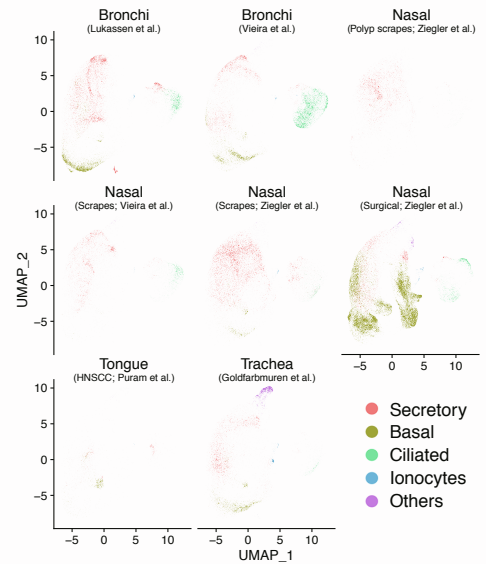

**C**

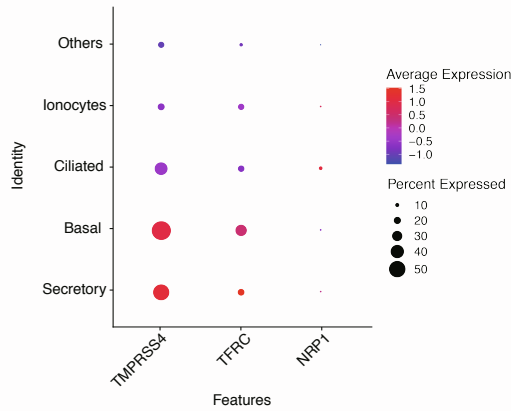

**D**

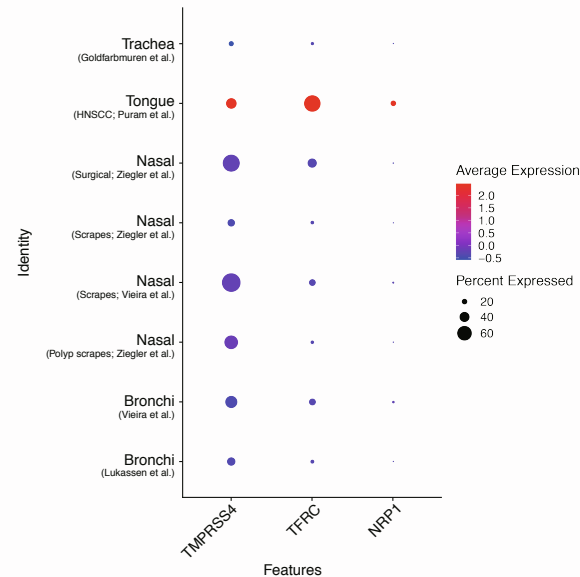

**E**

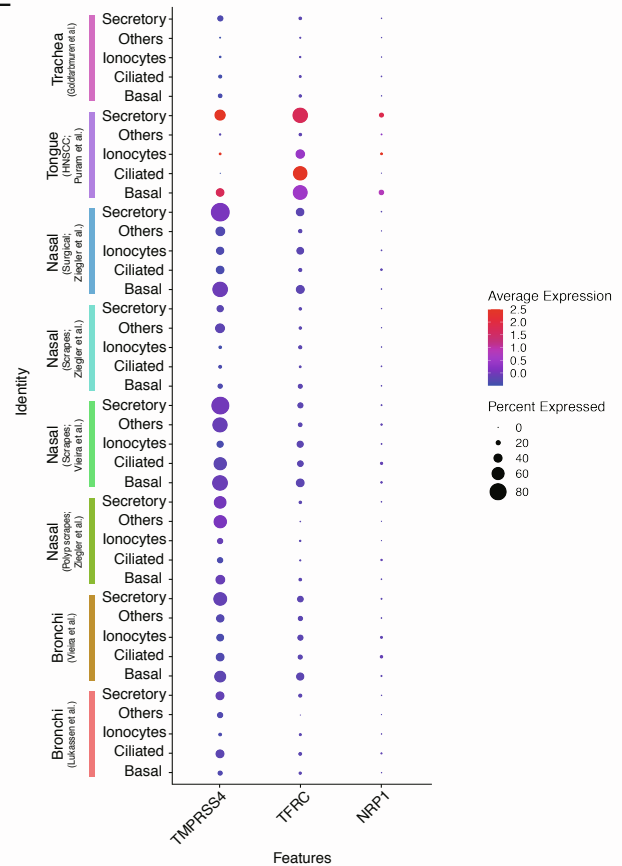

**Figure S1. Integration of 8 head & neck tissue sources for single-cell gene expression analysis. Related to Figure 1. (A)** Dot plot of the gene markers used to identify epithelial cell types of interest based on Ravindra et al. 2020. **(B)** An integrated UMAP representation of the combined data (Figure 1B) as divided by the annotated cell type. **(C)** RNA expression levels of *TMPRSS4*, *TFRC*, and *NRPI* in each cell type in epithelia. **(D)** RNA expression levels of *TMPRSS4*, *TFRC*, and *NRPI* in the 8 tissue sources. **(E)** RNA expression levels of *TMPRSS4*, *TFRC*, and *NRPI* in each cell type across the 8 tissue sources.



Figure S2

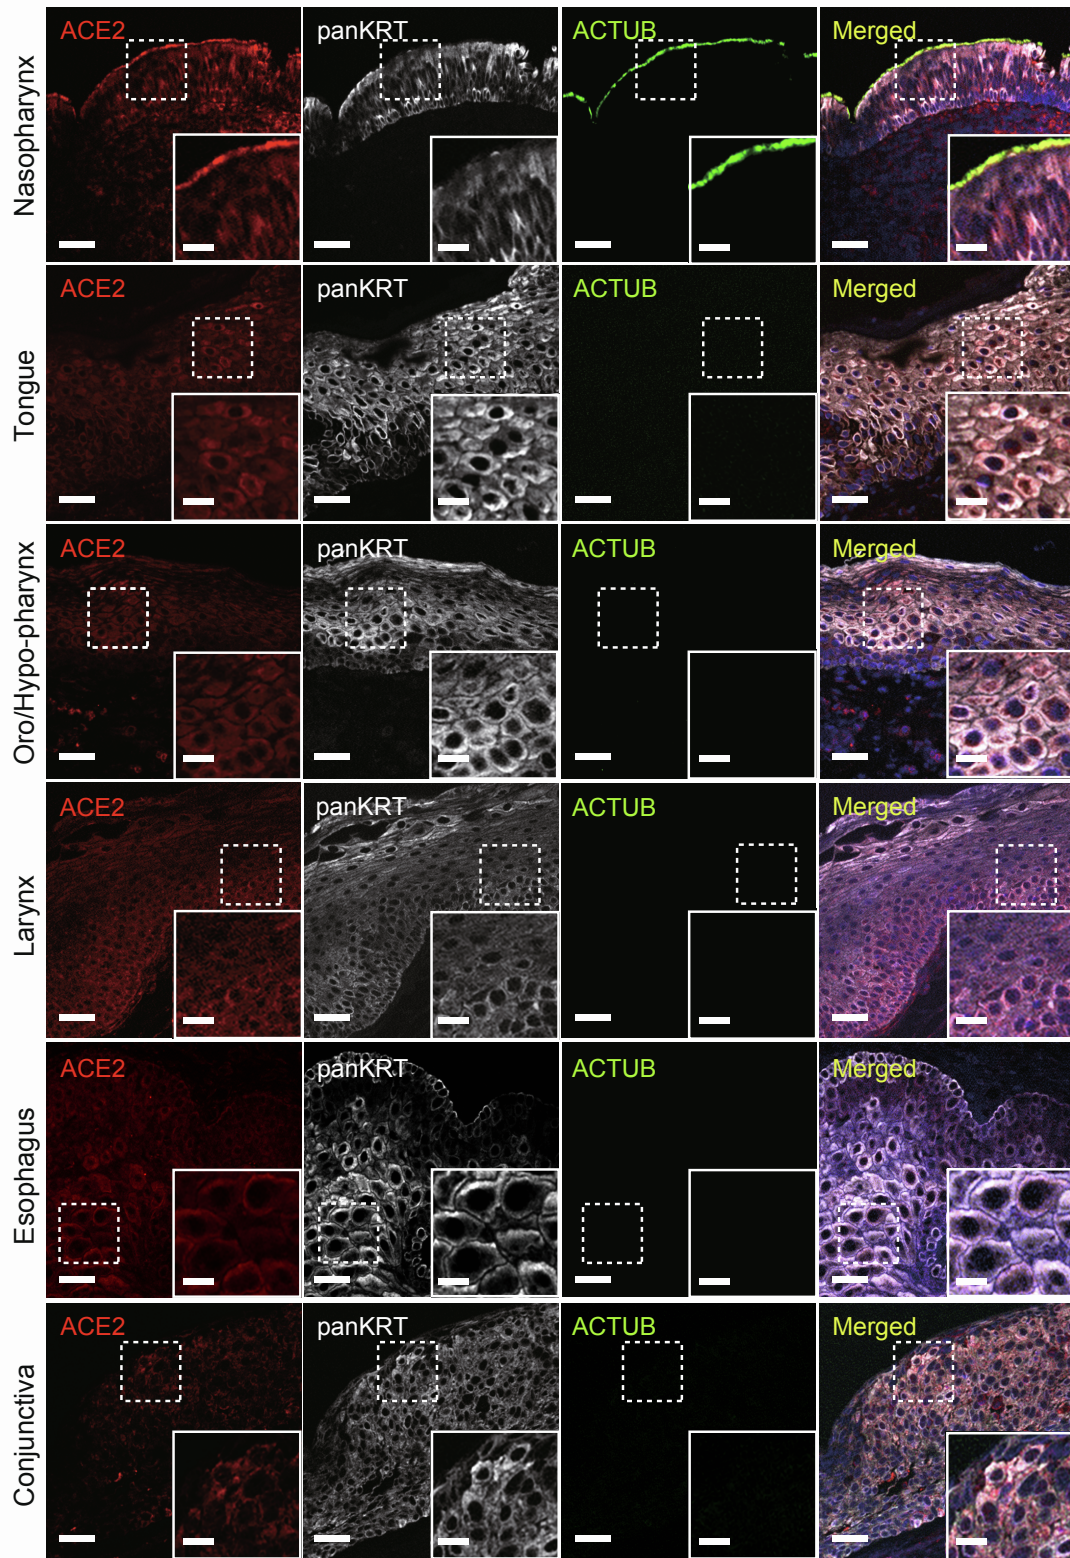

**Figure S2. ACE2 protein expression in normal human head & neck tissues. Related to Figure 3.** Representative immunofluorescence staining of ACE2, pan-cytokeratin (panKRT), and acetylated  $\alpha$ -tubulin (ACTUB) in normal human nasopharynx, tongue, oro/hypo-pharynx, larynx, esophagus, and conjunctiva. The nuclei were stained using Hoechst (blue) as a counterstain. ACTUB signal (green) is only present in tissues shown here that physiologically contain motile cilia (i.e. nasopharynx). Scale bars: 50  $\mu$ m and 20  $\mu$ m (inset images).



Figure S3

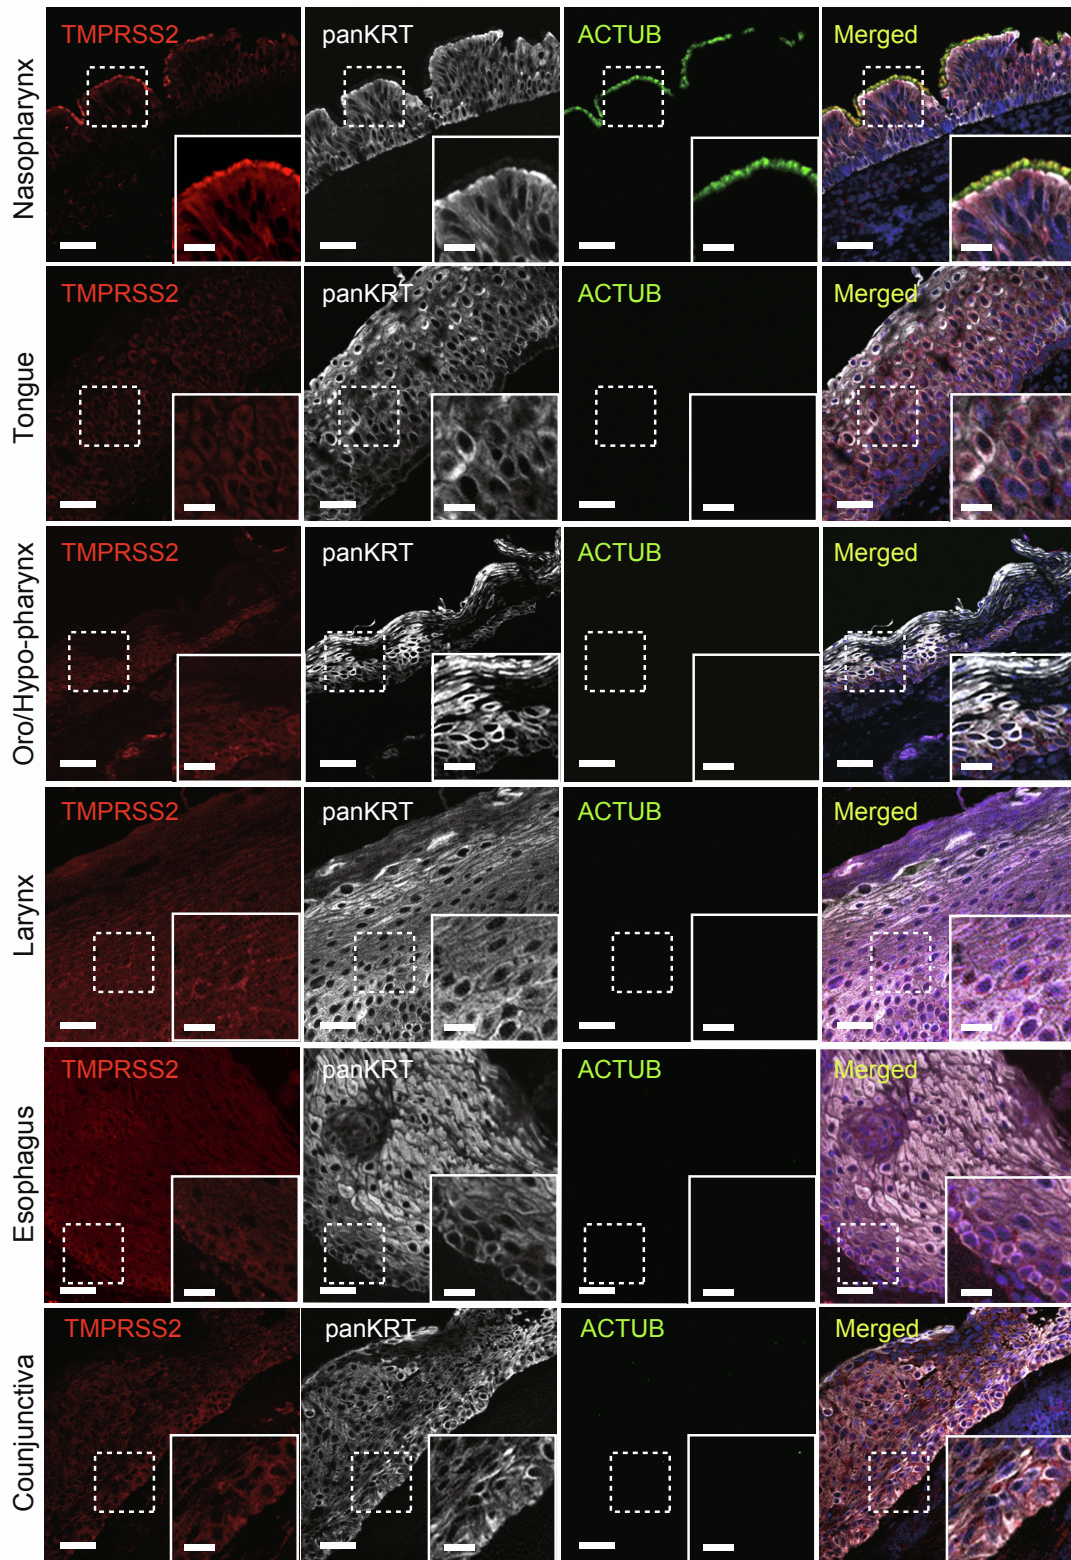

**Figure S3. TMPRSS2 protein expression in normal human head & neck tissues. Related to Figure 3.** Representative immunofluorescence staining of TMPRSS2, pan-cytokeratin (panKRT), and acetylated  $\alpha$ -tubulin (ACTUB) in normal human nasopharynx, tongue, oro/hypo-pharynx, larynx, esophagus, and conjunctiva. The nuclei were stained using Hoechst (blue) as a counterstain. ACTUB signal (green) is only present in tissues shown here that physiologically contain motile cilia (i.e. nasopharynx). Scale bars: 50  $\mu$ m and 20  $\mu$ m (insets).

**Figure S4**

**A**

Vero E6  
Mock infected

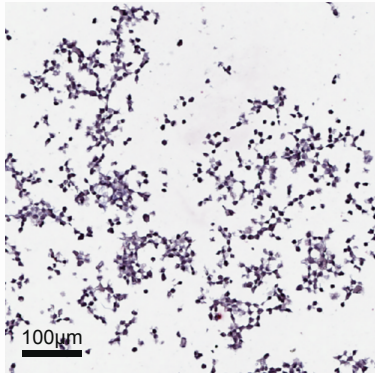

Vero E6  
SARS-CoV-2 infected

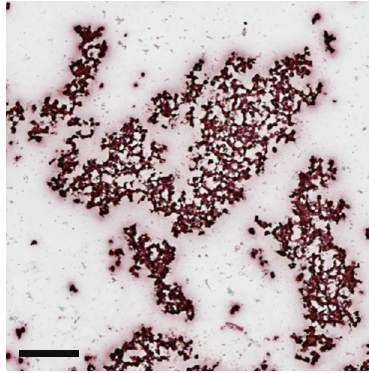

**B**

Lung  
Non-COVID-19

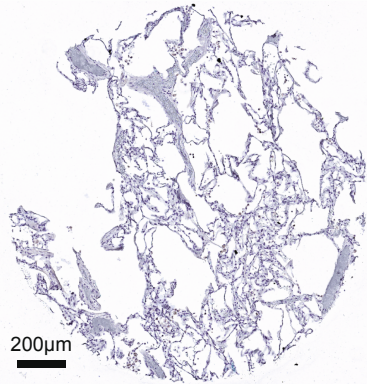

Lung  
COVID-19

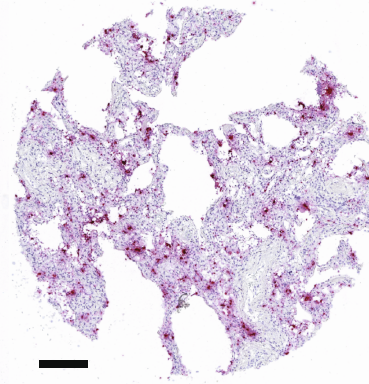

**C**

Nasal  
Non-COVID-19

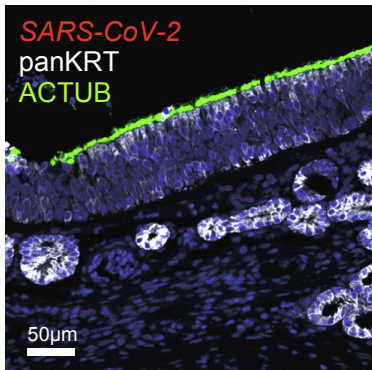

Nasal  
COVID-19

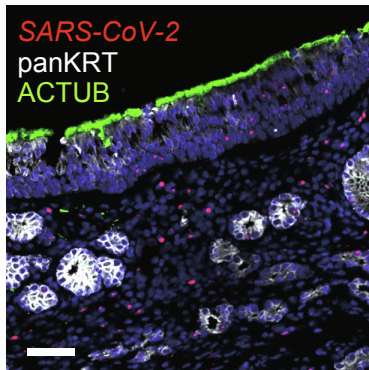

**Figure S4: SARS-CoV-2 Spike mRNA probe and assay validation. Related to Figure 4.** (A) SARS-CoV-2 Spike mRNA signal was detected in Vero E6 Formalin Fixed Paraffin Embedded (FFPE) cell pellets that were infected with SARS-CoV-2 (right). No signal was noted in the mock-treated pellets (left). (B) SARS-CoV-2 Spike mRNA probe detected signal only in lung autopsy tissue from patients with COVID-19 (right) and not in lung parenchyma from non-COVID controls (left). (C) SARS-CoV-2 Spike mRNA probe detected signal only in nasal autopsy tissues from patients with COVID-19 (right) and not in nasal tissues from non-COVID controls (left).



**Figure S5**

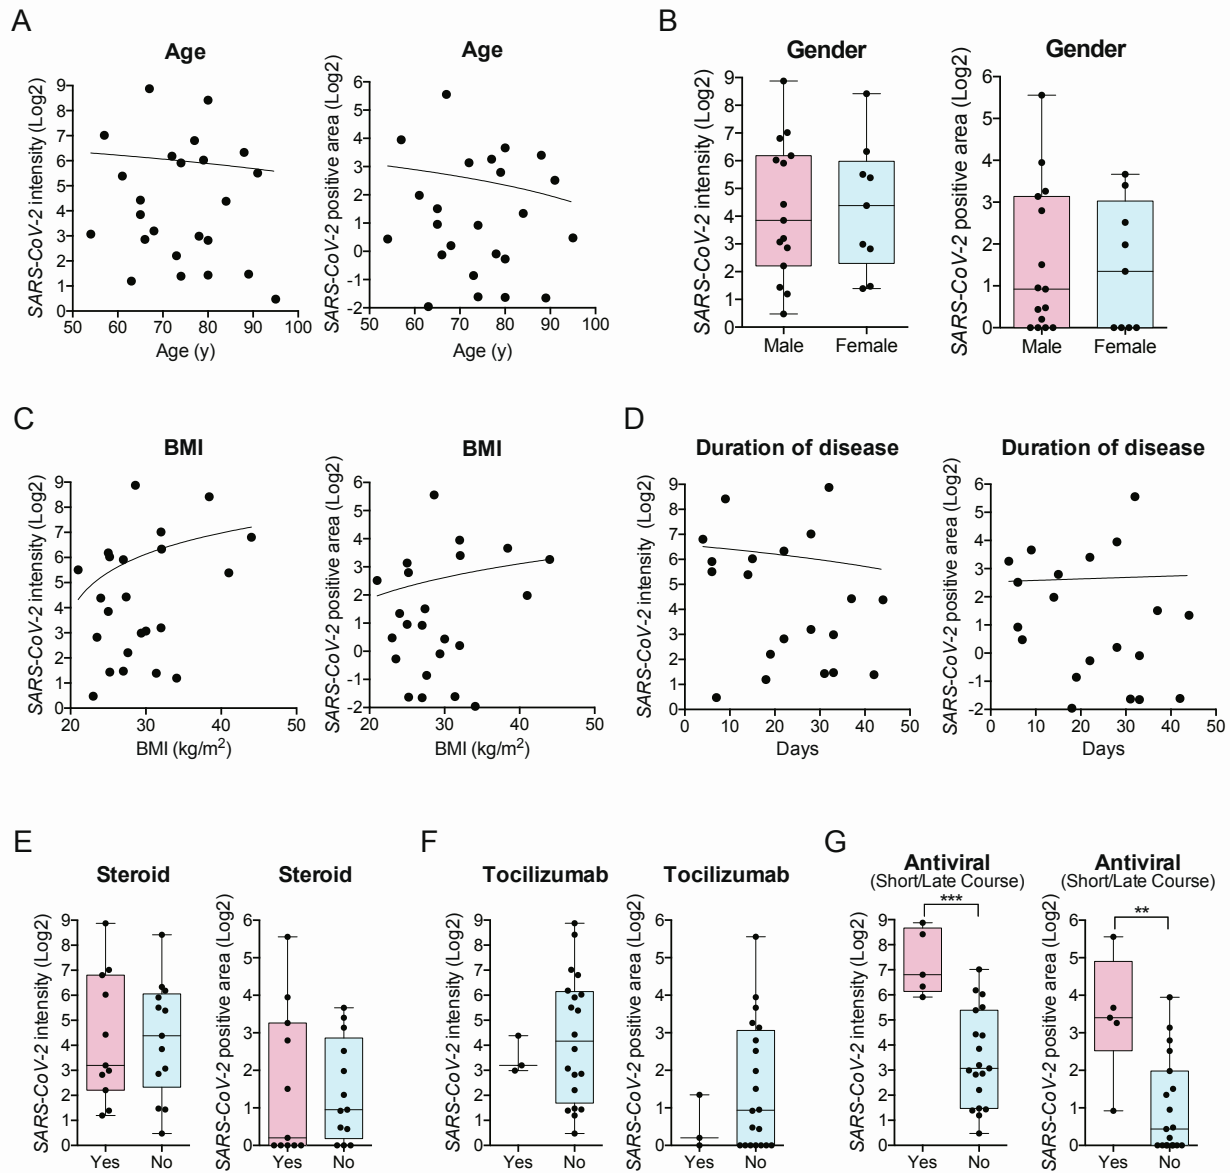

**Figure S5. Comparison of *SARS-CoV-2 Spike* mRNA epithelial expression by patient demographics, comorbidities, and therapeutic medications. Related to Figure 6. (A)** No statistically significant correlation was observed between age and *SARS-CoV-2 Spike* mRNA intensity (left)/positive area (right). The solid lines represent results from simple linear regression (n=24) (Left panel:  $y = 121.2 - 0.7731x$ ;  $R^2 = 0.0055$ ,  $p = 0.7304$ , F test. Right panel:  $y = 14.48 - 0.1174x$ ;  $R^2 = 0.0167$ ,  $p = 0.5476$ , F test). **(B)** No statistically significant differences were seen in *SARS-CoV-2 Spike* mRNA intensity (left)/positive area (right) between males and females (n=15 and n=9, respectively) (Two-tailed Mann-Whitney test,  $p = 0.9534$  and  $0.9070$ , respectively). **(C)** No statistically significant correlation was observed between body mass index (BMI) and *SARS-CoV-2 Spike* mRNA intensity (left)/positive area (right). The solid line represents results from simple linear regression (n=23) (Left panel:  $y = -96.88 + 5.568x$ ,  $R^2 = 0.0797$ ,  $p = 0.1920$ , F test. Right panel:  $y = -1.292 + 0.2482x$ ;  $R^2 = 0.0208$ ,  $p = 0.5118$ , F test). **(D)** No statistically significant correlation was observed between duration of disease (days from initial symptom to death) and *SARS-CoV-2 Spike* mRNA intensity (left)/positive area (right). The solid line represents results from simple linear regression

(n=20) (Left panel:  $y = 95.59 - 1.074x$ ,  $R^2 = 0.0121$ ,  $p = 0.6446$ , F test. Right panel:  $y = 5.763 + 0.0226x$ ;  $R^2 = 0.0007$ ,  $p = 0.9116$ , F test). (E) No statistically significant differences were seen in *SARS-CoV-2 Spike* mRNA intensity (left) or positive area (right) among patients who received or did not receive systemic steroids during hospitalization for COVID-19 (n=11 and n=13, respectively) (Two-tailed Mann-Whitney test,  $p > 0.9999$  and  $p = 0.8201$ , respectively). (F) *SARS-CoV-2 Spike* mRNA intensity (left) and positive area (right) are not statistically significantly different among patients who received tocilizumab compared to patients who did not receive IL-6 blockade during hospitalization for COVID-19 (n=3 and n=20, respectively) (Two-tailed Mann-Whitney test,  $***p = 0.8300$  and  $p = 0.6979$ , respectively). (G) *SARS-CoV-2 Spike* mRNA intensity (left) and positive area (right) are statistically significantly higher in patients who received incomplete and/or compassionate late courses of intravenous antivirals (remdesivir or lopinavir-ritonavir) compared to patients who did not receive antivirals during hospitalization for COVID-19 (n=5 and n=19, respectively) (Two-tailed Mann-Whitney test,  $***p = 0.0009$  and  $**p = 0.0071$ , respectively). The bands within the box plot show the median value. The bottom and top of the box plots represent the 25th and 75th percentiles, respectively. The whiskers extending from both ends of the boxes are minimum and maximum values. Each dot represents one patient.



Figure S6

A

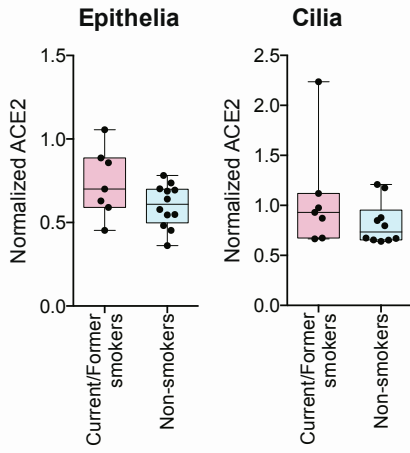

B

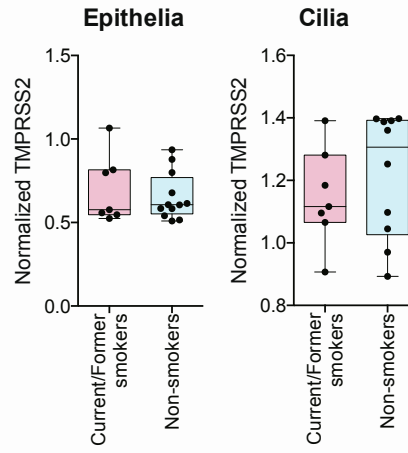

C

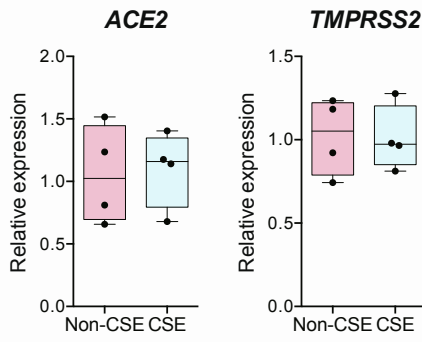

D

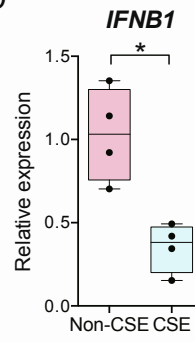

E

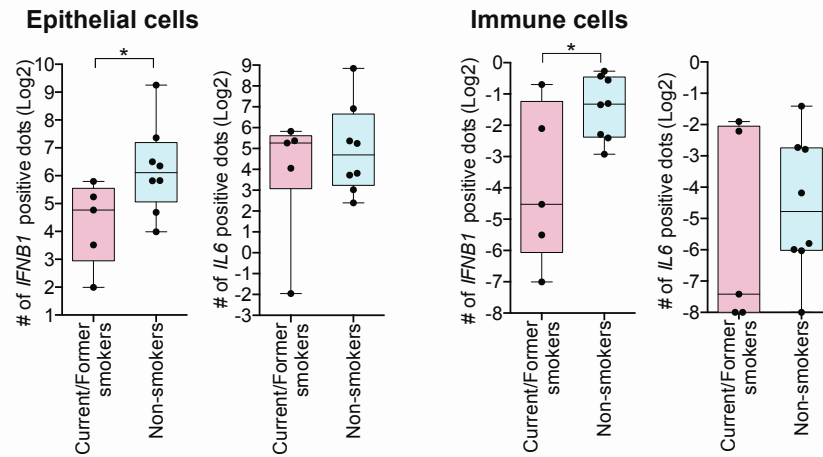

**Figure S6: Smoking does not affect SARS-CoV-2 entry factors, but reduces interferon- $\beta$ 1 response in SARS-CoV-2 infection. Related to Figure 7.** (A) Quantification of ACE2 in the epithelia and cilia in airway mucosal tissues from patients with COVID-19. ACE2 protein expression was not statistically significantly different in the epithelia and cilia between smokers (current/former) and non-smokers. (Two-tailed Mann-Whitney test,  $p = 0.1956$  and  $p = 0.2295$ , respectively). (B) Quantification of TMPRSS2 in the epithelia and cilia in airway mucosal tissues from COVID-19 patients. TMPRSS2 protein expression was not statistically significantly different in the epithelia and cilia between smokers (current/former) and non-smokers. (Two-tailed Mann-Whitney test,  $p = 0.5362$  and  $p > 0.9999$ , respectively). (C) Cigarette smoke extract (CSE) exposure does not affect expression of *ACE2* and *TMPRSS2* in SARS-CoV-2 infected air-liquid interface cultured human nasal epithelial cells by qPCR ( $n=4$ ) (One-tailed Mann-Whitney test,  $p = 0.5000$  and  $p = 0.4429$ , respectively). (D) Cigarette smoke extract (CSE) exposure suppresses *IFNB1* production in air-liquid interface cultured human nasal epithelial cells by qPCR ( $n=4$ ) (One-tailed Mann-Whitney test,  $p = 0.0143$ ). (E) The number of *IFNB1* dots in the epithelial cells and CD45<sup>+</sup> cells are significantly higher in non-smokers compared to smokers (current/former) ( $n=8$  and  $n=5$ , respectively) (One-tailed Mann-Whitney test,  $*p = 0.0225$  and  $*p = 0.0466$ , respectively). No statistically significant differences were seen in *IL6* in the epithelial cells and CD45<sup>+</sup> cells between both groups (One-tailed Mann-Whitney test,  $p = 0.3092$  and  $p = 0.4716$ , respectively). Each dot represents one individual sample.

**Table S1. COVID-19 patient cohort demographics, comorbidities, and therapeutic medication use. Related to Fig. 6 and S5.**

|     | Age (yrs) | Sex    | Body mass index (kg/m <sup>2</sup> ) | Smoking | Diabetes (pre-existing) | Hypertension (pre-existing) | Days from symptom onset | Systemic steroids | Tocilizumab | Antiviral                                                      |
|-----|-----------|--------|--------------------------------------|---------|-------------------------|-----------------------------|-------------------------|-------------------|-------------|----------------------------------------------------------------|
| 1   | 88        | Female | 32                                   | Unknown | No                      | Yes                         | 22                      | No                | Unknown     | Remdesivir<br>(2 doses starting on day 21 of symptoms)         |
| 2   | 65        | Male   | 27                                   | Current | No                      | No                          | 37                      | Yes               | No          | No                                                             |
| 3   | 80        | Female | 38                                   | Never   | No                      | Yes                         | 9                       | No                | No          | Remdesivir<br>(2 doses starting on day 8 of symptoms)          |
| 4   | 57        | Male   | 32                                   | Current | Yes                     | Yes                         | 28                      | Yes               | No          | No                                                             |
| 5   | 91        | Female | 21                                   | Never   | No                      | No                          | 6                       | No                | No          | No                                                             |
| 6   | 65        | Male   | 25                                   | Never   | Yes                     | No                          | Unknown                 | No                | No          | No                                                             |
| 7   | 67        | Male   | 29                                   | Former  | No                      | No                          | 32                      | Yes               | No          | Remdesivir<br>(5 doses starting on day 9 of symptoms)          |
| 8   | 54        | Male   | 30                                   | Never   | No                      | No                          | Unknown                 | No                | No          | No                                                             |
| 9*  | 53        | Male   | 49                                   | Unknown | No                      | No                          | Unknown                 | Unknown           | Unknown     | Unknown                                                        |
| 10  | 61        | Female | 41                                   | Unknown | Yes                     | No                          | 14                      | No                | No          | No                                                             |
| 11  | 72        | Male   | 25                                   | Former  | No                      | Yes                         | Unknown                 | No                | No          | No                                                             |
| 12* | 96        | Male   | 25                                   | Unknown | No                      | Yes                         | 18                      | Unknown           | Unknown     | Unknown                                                        |
| 13  | 89        | Female | 27                                   | Unknown | Yes                     | Yes                         | 33                      | No                | No          | No                                                             |
| 14  | 84        | Female | 24                                   | Unknown | Yes                     | Yes                         | 44                      | No                | Yes         | No                                                             |
| 15  | 95        | Male   | 23                                   | Never   | No                      | Yes                         | 7                       | No                | No          | No                                                             |
| 16  | 77        | Male   | 44                                   | Former  | Yes                     | Yes                         | 4                       | Yes               | No          | Lopinavir/Ritonavir<br>(2 doses starting on day 4 of symptoms) |
| 17  | 74        | Male   | 27                                   | Former  | Yes                     | Yes                         | 6                       | No                | No          | Lopinavir/Ritonavir<br>(2 doses starting on day 4 of symptoms) |
| 18* | 88        | Male   | 28                                   | Never   | No                      | No                          | 16                      | Unknown           | Yes         | Unknown                                                        |
| 19  | 79        | Male   | 25                                   | Never   | Yes                     | Yes                         | 15                      | Yes               | No          | No                                                             |
| 20  | 66        | Male   | Unknown                              | Never   | No                      | Unknown                     | Unknown                 | No                | No          | No                                                             |
| 21  | 73        | Male   | 28                                   | Never   | Yes                     | Yes                         | 19                      | Yes               | No          | No                                                             |
| 22  | 78        | Female | 29                                   | Never   | Yes                     | Yes                         | 33                      | Yes               | Yes         | No                                                             |
| 23  | 80        | Female | 24                                   | Never   | No                      | Yes                         | 22                      | Yes               | No          | No                                                             |
| 24  | 80        | Male   | 25                                   | Never   | No                      | Yes                         | 31                      | No                | No          | No                                                             |
| 25  | 63        | Male   | 34                                   | Never   | No                      | No                          | 18                      | Yes               | No          | No                                                             |
| 26  | 68        | Male   | 32                                   | Never   | No                      | Yes                         | 28                      | Yes               | Yes         | No                                                             |
| 27  | 74        | Female | 31                                   | Never   | No                      | No                          | 42                      | Yes               | No          | No                                                             |

\*Patients not included in analyses of association between viral replication and clinical characteristics (Fig. 6 and S5) because nasal/tracheal samples were not available from these patients. See Results section for more details.
